# Supplementary material for: What Are the Maternal Factors that Potentially Intervenes in the Nutritional Composition of Human Milk?
Source: MDPI journal article supplement (doi:10.3390/nu13051587), 2021-05-10
Supplement: s1 [file s1]

**Supplementary Table S1.** Nutritional composition of human milk in the 2nd month after delivery according to maternal factors, 2016 – 2017.

| Level 1 (distal)                         | 2nd month after delivery |          |               |           |        |           |         |           |
|------------------------------------------|--------------------------|----------|---------------|-----------|--------|-----------|---------|-----------|
|                                          | Energy                   |          | Carbohydrates |           | Lipids |           | Protein |           |
|                                          | Median                   | Range    | Median        | Range     | Median | Range     | Median  | Range     |
| <b>Maternal age in years</b>             |                          |          |               |           |        |           |         |           |
| < 19                                     | 56.5                     | 41 – 66  | 7.0           | 6.5 – 7.4 | 2.6    | 0.8 – 3.8 | 0.7     | 0.6 – 9.0 |
| 19–34                                    | 56.5                     | 28 – 102 | 7.0           | 3.2 – 8.9 | 2.7    | 0.6 – 7.9 | 0.9     | 0.3 – 8.0 |
| > 34                                     | 54.0                     | 37 – 113 | 6.9           | 4.6 – 7.5 | 2.5    | 0.5 – 8.6 | 0.9     | 0.5 – 3.0 |
| <b>Schooling</b>                         |                          |          |               |           |        |           |         |           |
| Primary education                        | 59.5                     | 39 – 82  | 7.1           | 4.6 – 8.9 | 3.1    | 0.6 – 5.5 | 0.8     | 0.3 – 9.0 |
| Secondary education                      | 54.0                     | 37 – 100 | 6.9           | 3.2 – 7.7 | 2.5    | 0.5 – 7.7 | 0.9     | 0.4 – 3.0 |
| College +                                | 55.0                     | 28 – 113 | 6.9           | 4.9 – 7.6 | 2.4    | 0.6 – 8.6 | 0.9     | 0.4 – 8.0 |
| <b>Parity</b>                            |                          |          |               |           |        |           |         |           |
| Primipara                                | 59.0                     | 28 – 113 | 6.9           | 4.9 – 7.7 | 2.7    | 0.6 – 8.6 | 0.9     | 0.3 – 9.0 |
| Multipara                                | 53.5                     | 37 – 100 | 7.0           | 3.2 – 8.9 | 2.3    | 0.5 – 7.7 | 0.9     | 0.4 – 2.3 |
| <b>Nutritional status</b>                |                          |          |               |           |        |           |         |           |
| Low weight                               | 47.0                     | 28 – 72  | 6.7           | 4.9 – 7.4 | 1.4    | 0.6 – 4.4 | 0.8     | 0.5 – 8.0 |
| Adequate weight                          | 53.0                     | 37 – 100 | 7.1           | 3.2 – 7.7 | 2.3    | 0.5 – 7.7 | 0.9     | 0.4 – 9.0 |
| Overweight                               | 60.0                     | 42 – 113 | 6.9           | 4.6 – 7.5 | 2.8    | 0.9 – 8.6 | 0.9     | 0.3 – 3.0 |
| Obese                                    | 60.0                     | 39 – 102 | 6.9           | 5.8 – 8.9 | 3.0    | 0.6 – 7.9 | 0.8     | 0.5 – 1.3 |
| <b>Level 2 (intermediate)</b>            |                          |          |               |           |        |           |         |           |
| <b>Number of pre-natal consultations</b> |                          |          |               |           |        |           |         |           |
| < 6                                      | 54.0                     | 47 – 59  | 7.0           | 6.7 – 7.4 | 2.3    | 1.4 – 2.9 | 0.9     | 0.8 – 1.0 |
| ≥ 6                                      | 55.0                     | 28 – 113 | 7.0           | 3.2 – 8.9 | 2.5    | 0.5 – 8.6 | 0.9     | 0.3 – 9.0 |
| <b>Gestational weight gain</b>           |                          |          |               |           |        |           |         |           |
| Below recommended                        | 49.0                     | 37 – 70  | 7.1           | 6.0 – 8.9 | 1.9    | 0.5 – 3.8 | 0.8     | 0.4 – 1.2 |
| Adequate                                 | 58.5                     | 39 – 113 | 6.9           | 5.3 – 7.7 | 2.8    | 0.7 – 8.6 | 0.9     | 0.4 – 8.0 |
| Above recommended                        | 57.0                     | 28 – 102 | 6.9           | 3.2 – 7.6 | 2.8    | 0.6 – 7.9 | 0.9     | 0.3 – 9.0 |
| <b>Level 3 (proximal)</b>                |                          |          |               |           |        |           |         |           |
| <b>Alcohol consumption</b>               |                          |          |               |           |        |           |         |           |
| Yes                                      | 59.0                     | 49 – 77  | 6.8           | 4.6 – 7.4 | 2.5    | 1.9 – 5.0 | 0.9     | 0.5 – 2.3 |
| No                                       | 54.5                     | 28 – 113 | 7.0           | 3.2 – 8.9 | 2.6    | 0.5 – 8.6 | 0.9     | 0.3 – 9.0 |
| <b>Smoking</b>                           |                          |          |               |           |        |           |         |           |
| Yes                                      | 83.5                     | 65 – 102 | 6.2           | 5.8 – 6.6 | 5.7    | 3.5 – 7.9 | 1.0     | 0.8 – 1.1 |
| No                                       | 55.0                     | 28 – 113 | 7.0           | 3.2 – 8.9 | 2.5    | 0.5 – 8.6 | 0.9     | 0.3 – 9.0 |
| <b>Diabetes Mellitus</b>                 |                          |          |               |           |        |           |         |           |
| Yes                                      | 54.0                     | 40 – 82  | 7.2           | 4.6 – 7.5 | 2.4    | 0.6 – 5.1 | 0.9     | 0.4 – 3.0 |
| No                                       | 55.0                     | 28 – 113 | 6.9           | 3.2 – 8.9 | 2.6    | 0.5 – 8.6 | 0.8     | 0.3 – 9.0 |
| <b>Hypertension</b>                      |                          |          |               |           |        |           |         |           |
| Yes                                      | 60.0                     | 39 – 113 | 6.8           | 3.2 – 8.9 | 2.9    | 0.6 – 8.6 | 0.9     | 0.5 – 3.0 |
| No                                       | 53.0                     | 28 – 100 | 7.0           | 4.9 – 7.7 | 2.2    | 0.5 – 7.7 | 0.8     | 0.3 – 9.0 |
